# Supplementary material for: Pituitary and Brain Dopamine D2 Receptors Regulate Liver Gene Sexual Dimorphism
Source: Oxford University Press journal article supplement (doi:10.1210/en.2014-1714), 2014-12-29

Supplemental Table 1: Description of primers used for real-time PCR.

| <b>Gene</b>        | <b>Strand</b>    | <b>Primer sequence (5'- 3')</b>   | <b>Source</b>      |
|--------------------|------------------|-----------------------------------|--------------------|
| <i>Adh1</i>        | <i>Sense</i>     | <i>GCTCTGCCGTCAAAGTCGCCA</i>      | <i>Designed by</i> |
|                    | <i>Antisense</i> | <i>ACCGACACCTCCGAGGCCAA</i>       | <i>PrimerBlast</i> |
| <i>Cyclophilin</i> | <i>Sense</i>     | <i>CAGAACAT ATCCCTGCAT</i>        | <i>Designed by</i> |
|                    | <i>Antisense</i> | <i>G TTCAGCTCTGGGATGACCTT</i>     | <i>PrimerBlast</i> |
| <i>Cyp2a4</i>      | <i>Sense</i>     | <i>AGCAGGCTACCT TCGACTGG</i>      | (1)                |
|                    | <i>Antisense</i> | <i>GCTGCTGAAGGCTATGCCAT</i>       |                    |
| <i>Cyp2b9</i>      | <i>Sense</i>     | <i>CTGAGACCACAAGCGCCAC</i>        | (1)                |
|                    | <i>Antisense</i> | <i>CTTGAGCATGAGCAGGACTCC</i>      |                    |
| <i>Cyp2d9</i>      | <i>Sense</i>     | <i>AGTCTCTGGCTTAATTCCTGAT</i>     | (1)                |
|                    | <i>Antisense</i> | <i>CGCAAGAGTATCGGGAATGC</i>       |                    |
| <i>Cyp7b1</i>      | <i>Sense</i>     | <i>TGAGGTTCTGAGGCTGTGCTC</i>      | <i>Designed by</i> |
|                    | <i>Antisense</i> | <i>TCCTGCACTTCTCGGATGATG</i>      | <i>PrimerBlast</i> |
| <i>Cyp3a16</i>     | <i>Sense</i>     | <i>AGCACCGCGTGGACTTTATT</i>       | <i>Designed by</i> |
|                    | <i>Antisense</i> | <i>GGGCTGTGATCTCGATTCAG</i>       | <i>PrimerBlast</i> |
| <i>Cyp3a44</i>     | <i>Sense</i>     | <i>TTGTGGAGGAAGCCAAAAAGTTT</i>    | <i>Designed by</i> |
|                    | <i>Antisense</i> | <i>TGAGAAGAGCAAAGGATCAAAAAAGT</i> | <i>PrimerBlast</i> |
| <i>Cyp3a41</i>     | <i>Sense</i>     | <i>GTGGAGAAAGCCAAAGGGATT</i>      | <i>Designed by</i> |
|                    | <i>Antisense</i> | <i>GAAGACCAAAGGATCAAAAAAGTCA</i>  | <i>PrimerBlast</i> |
| <i>Mup</i>         | <i>Sense</i>     | <i>GACTTTTTCTGGAGCAAATCCATG</i>   | (2)                |
| <i>1/2/6/8*</i>    | <i>Antisense</i> | <i>GAGCACTCTTCATCTCTTACAG</i>     |                    |
| <i>Mup1</i>        | <i>Sense</i>     | <i>CAAAACAGAAAAGGCTGGTGA</i>      | <i>Designed by</i> |

|               |                  |                              |                    |
|---------------|------------------|------------------------------|--------------------|
|               | <i>Antisense</i> | <i>TTGTGCAAACCTTTCCTTGA</i>  | <i>PrimerBlast</i> |
| <i>Ghr</i>    | <i>Sense</i>     | <i>CCAACTCGCCTCTACACCG</i>   | <i>Designed by</i> |
|               | <i>Antisense</i> | <i>GGGAAAGGACTACACCACCTG</i> | <i>PrimerBlast</i> |
| <i>Prlr</i>   | <i>Sense</i>     | <i>CACAGTAAATGCCACGAACG</i>  | <i>Designed by</i> |
|               | <i>Antisense</i> | <i>GGCAACCATTTTACCCACAG</i>  | <i>PrimerBlast</i> |
| <i>Igf1</i>   | <i>Sense</i>     | <i>TGTAAACGACCCGGACCTAC</i>  | (3)                |
|               | <i>Antisense</i> | <i>CACGAACTGAAGAGCATCCA</i>  |                    |
| <i>Igfbp3</i> | <i>Sense</i>     | <i>ACCCAGAACTTCTCCTCCGA</i>  | <i>Designed by</i> |
|               | <i>Antisense</i> | <i>CCGCTTCTGCCTTTGGAAG</i>   | <i>PrimerBlast</i> |
| <i>Glucor</i> | <i>Sense</i>     | <i>CGGGACCACCTCCCAA</i>      | <i>Designed by</i> |
|               | <i>Antisense</i> | <i>CCCCATAATGGCATCCCGAA</i>  | <i>PrimerBlast</i> |

\* Mayor urinary protein (MUP) primers will potentially amplify four different *Mup* mRNA (if expressed), i.e., *Mup1*, *Mup2*, *Mup6* and *Mup8*.

#### Reference List

1. Wiwi CA, Gupte M, Waxman DJ . Sexually dimorphic P450 gene expression in liver-specific hepatocyte nuclear factor 4alpha-deficient mice. *Mol Endocrinol* 2004; 18:1975-1987.
2. Holloway MG, Laz EV, Waxman DJ . Codependence of growth hormone-responsive, sexually dimorphic hepatic gene expression on signal transducer and activator of transcription 5b and hepatic nuclear factor 4alpha. *Mol Endocrinol* 2006; 20:647-660.
3. Eleswarapu S, Gu Z, Jiang H . Growth hormone regulation of insulin-like growth factor-I gene expression may be mediated by multiple distal signal transducer and activator of transcription 5 binding sites. *Endocrinology* 2008; 149:2230-2240.

Supplemental Table 2: PCR conditions for different genes.

| <b>Gene</b>         | <b>Denaturation</b> | <b>Annealing/Extension</b> |                  |
|---------------------|---------------------|----------------------------|------------------|
| <i>Adhl</i>         | 95°C for 15 s       | 60°C for 1 min             |                  |
| <i>Cyclophilin</i>  | 95°C for 15 s       | 60°C for 1 min             |                  |
| <i>Cyp2a4</i>       | 95°C for 15 s       | 60°C for 1 min             |                  |
| <i>Cyp2b9</i>       | 95°C for 15 s       | 60°C for 1 min             |                  |
| <i>Cyp2d9</i>       | 95°C for 15 s       | 60°C for 1 min             |                  |
| <i>Cyp7b1</i>       | 95°C for 15 s       | 60°C for 1 min             |                  |
| <i>Mup 1/2/6/8*</i> | 95°C for 15 s       | 60°C for 1 min             |                  |
| <i>Mup1</i>         | 95°C for 15 s       | 60°C for 1 min             |                  |
| <i>Ghr</i>          | 95°C for 15 s       | 60°C for 1 min             |                  |
| <i>Igfbp3</i>       | 95 C for 15 s       | 60°C for 1 min             |                  |
| <i>Glucor</i>       | 95 C for 15 s       | 60°C for 1 min             |                  |
| <i>Igf1</i>         | 95 C for 15 s       | 60°C for 1 min             |                  |
| <b>Gene</b>         | <b>Denaturation</b> | <b>Annealing</b>           | <b>Extension</b> |
| <i>Cyp3a16</i>      | 95°C for 15 s       | 56°C for 20 sec            | 72°C for 20sec   |
| <i>Cyp3a44</i>      | 95°C for 15 s       | 56°C for 20sec             | 72°C for 20sec   |
| <i>Cyp3a41</i>      | 95°C for 15 s       | 56°C for 20sec             | 72°C for 20sec   |
| <i>Prlr</i>         | 95°C for 30 s       | 61°C for 1 min             | 72°C for 30sec   |

\* Mayor urinary protein (MUP) primers will potentially amplify four different *Mup* mRNA (if expressed), i.e., *Mup1*, *Mup2*, *Mup6* and *Mup8*.

**Supplemental Figure 1: Expression of liver *Igfbp3* and *Glucor* expression in female and male *Drd2*<sup>-/-</sup>, neuroDrd2KO and lacDrd2KO mice.** Percentage of target mRNA levels normalized to cyclophilin mRNA levels, in relation to control females are represented in the Y axis. N= 5 in *Drd2*<sup>-/-</sup>, 8-10 in neuroDrd2KO and 6-8 lacDrd2KO mice. Two way analysis of variance for the effects of sex and genotype was performed. *P* of interaction was not significant in any case. \* *P* < 0.05 vs sex-matched *Drd2*<sup>+/+</sup> mice.

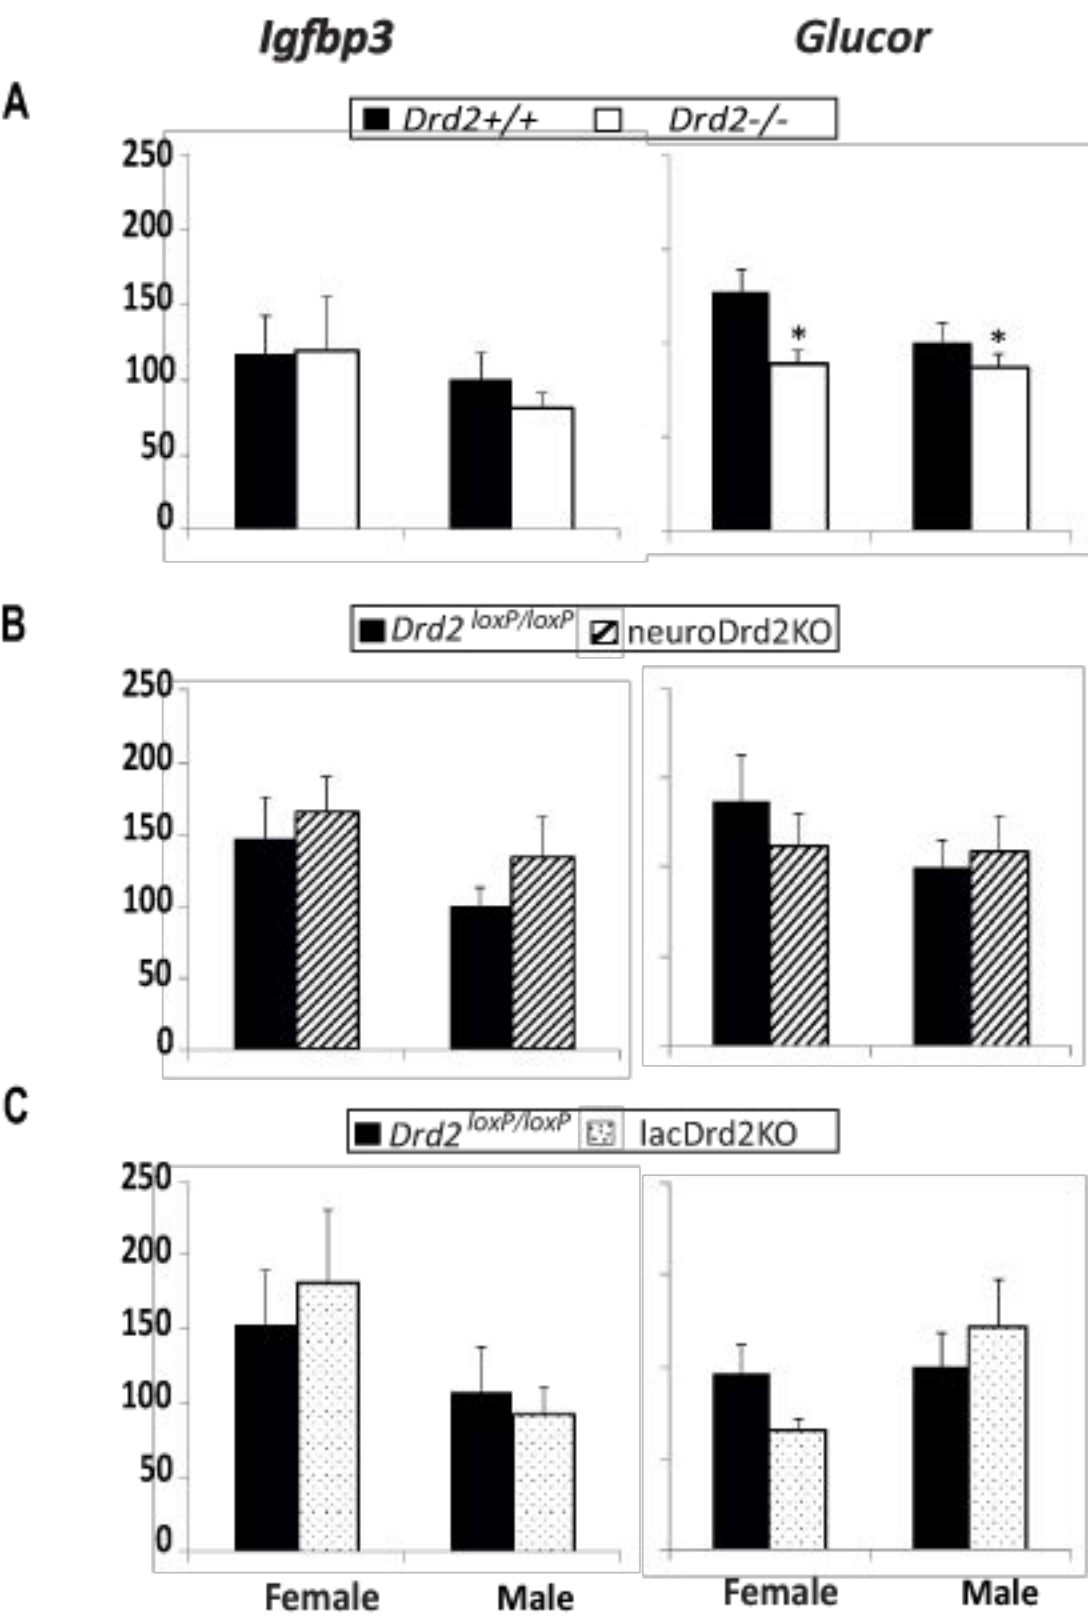

Supplement: en-14-1714.pdf [file en-14-1714.pdf]
